# Supplementary material
Source: publisher figshare collection journal article supplement (https://tandf.figshare.com/ndownloader/files/21490365)
Supplement: Supplementary file 1 [file 21490365]

Table S1. 3H content of the precipitation (TU±1 sigma) in the eastern Lithuania (sampling site possition: 55.7295 N, 26.1788 E ) in 2016-2019. In brackets monthly precipitation amount (mm).

| **Month** | **2016** | **2017** | **2018** | **2019** |
| --- | --- | --- | --- | --- |
| **January** | 6.7±0.5 (25) | 5.9±0.5 (44) | 8.4±0.6 (49) | 5.8±0.4 (67) |
| **February** | 7.3±0.5 (60) | 5.7±0.4 (62) | 7.4±0.5 (48) | 7.7±0.5 (30) |
| **March** | 8.7±0.6 (55) | 7.4±0.5 (80) | 12.6±0.9 (15) | 7.6±0.5 (50) |
| **April** | 9.6±0.7 (60) | 8.4±0.6 (80) | 7.7±0.5 (30) | 14.0±0.9 (15) |
| **May** | 18.1±1.2 (55) | 11.8±0.8 (20) | 16.4±1.1 (23) | 13.4±0.9 (54) |
| **June** | 11.8±0.8 (35) | 8.2±0.6 (55) | 13.3±0.9 (46) | 14.3±0.9 (23) |
| **July** | 14.7±1.0 (115) | 11.8±0.8 (144) | 18.3±1.2 (125) | 13.5±0.9 (66) |
| **August** | 10.0±0.7 (75) | 12.1±0.8 (125) | 11.4±0.8 (63) | 9.1±0.6 (68) |
| **September** | 8.7±0.7 (10) | 11.3±0.8 (140) | 9.6±0.7 (45) | - |
| **October** | 8.1±0.6 (60) | 8.3±0.6 (110) | 6.6±0.5 (45) | - |
| **November** | 7.1±0.5 (55) | 6.7±0.5 (75) | 5.8±0.4 (15) | - |
| **December** | 5.1±0.4 (76) | 6.2±0.4 (60) | 5.7±0.4 (57) | - |
| **Annual precipitation amount, mm** | 681 | 995 | 561 | - |

Table S2. Isotope, salinity and temperature data of surface seawater samples taken by the cruise of Sailing Vessel BRABANDER (Klaipėda University, Lithuania) in June – August of 2016 (Fig. 1 and 2 (A)).

| **Station**  **No** | **Geographical position of sampling station** | | **Date** | **Salinity (PSU)** | **T**  **(oC)** | **3H**  **(TU; ±1 sigma)** | **δ18O**  **(‰ VSMOW)** |
| --- | --- | --- | --- | --- | --- | --- | --- |
| **Lat. (oN)** | **Long. (oE or oW** |
| 1 | 55.5228 | 20.4023 E | 25-06 | n/m | n/m | 7.3±1.7* | -8.18 |
| 2 | 54.9017 | 17.6483 E | 26-06 | n/m | n/m | 9.4±1.8* | -8.71 |
| 3 | 55.3228 | 15.1933 E | 27-06 | n/m | n/m | 7.8±1.7* | -6.99 |
| 4 | 55.3568 | 13.0047 E | 28-06 | n/m | n/m | 8.4±1.9* | -6.19 |
| 5 | 55.6895 | 12.8907 E | 28-06 | n/m | n/m | 8.7±1.8* | -5.03 |
| 6 | 56.1613 | 12.5290 E | 29-06 | n/m | n/m | 8.2±1.8* | n/m |
| 7 | 57.6750 | 10.7200 E | 30-06 | n/m | n/m | 13.0±1.9* | -2.09 |
| 8 | 58.7932 | 10.3708 E | 02-07 | n/m | n/m | 13.3±1.9* | -1.09 |
| 9 | 58.2540 | 8.5432 E | 05-07 | n/m | n/m | 11.6±1.9* | -0.82 |
| 10 | 58.5138 | 6.8783 E | 06-07 | n/m | n/m | 14.9±1.9* | -0.47 |
| 11 | 59.3147 | 3.0268 E | 14-07 | 32.7 | 14.2 | 9.6±1.8*  7.1±0.5 | 0.23 |
| 12 | 59.9720 | 0.6802 W | 15-07 | 34.7 | 13.5 | 3.9±1.8*  1.9±0.2 | 0.40 |
| 13 | 61.1608 | 0.6902 W | 17-07 | 35.3 | 11.8 | 0.7±0.1 | n/m |
| 14 | 61.6405 | 4.6140 W | 18-07 | 35.0 | 11.0 | 0.6±0.1 | n/m |
| 15 | 62.2947 | 6.8450 W | 19-07 |  |  | 0.6±0.1 | n/m |
| 16 | 63.1278 | 8.8913 W | 20-07 | 34.5 | 11.5 | 0.5±0.1 | n/m |
| 17 | 64.0107 | 11.1667 W | 20-07 | 35.0 | 10.8 | 0.6±0.1 | 0.22 |
| 18 | 64.8458 | 13.3468 W | 21-07 | 34.5 | 6.8 | 0.6±0.1 | 0.00 |
| 19 | 65.2705 | 13.5383 W | 22-07 | n/m | n/m | 0.7±0.1 | -0.09 |
| 20 | 66.1002 | 14.2908 W | 24-07- | n/m | n/m | 0.7±0.1 | -0.01 |
| 21 | 66.5550 | 16.3950 W | 25-07- | n/m | n/m | 0.6±0.1 | -0.01 |
| 22 | 66.2200 | 18.7683 W | 31-07 | n/m | n/m | 0.8±0.1 | -0.15 |
| 23 | 66.5133 | 22.4852 W | 01-08 | n/m | n/m | 0.3±0.1 | 0.48 |
| 24 | 65.0983 | 24.1718 W | 03-08 | n/m | n/m | 0.6±0.1 | 0.30 |

*direct 3H measurement; n/m – not measured

Table S3. Isotope, salinity and temperature data of seawater samples taken by the monitoring cruise of R/V SALME (Tallinn University of Technology) in October of 2016 (Fig. 2 (B)).

| **Station**  **No** | **Lat. (oN)** | **Long. (oE)** | **Date** | **Depth**  **(m)** | **Salinity (PSU)** | **T (oC)** | **δ2H**  **(‰ VSMOW)** | **δ18O**  **(‰ VSMOW)** |
| --- | --- | --- | --- | --- | --- | --- | --- | --- |
| N8 | 59.47503 | 27.97667 | 31-10 | 1 | 4.43 | 7.66 | -57.9 | -7.59 |
| 13 | 4.8 | 8.44 | -57.8 | -7.46 |
| N12 | 59.58331 | 27.45136 | 31-10 | 1 | 4.86 | 8.57 | -57.9 | -7.56 |
| 32 | 7.04 | 5.22 | -53.0 | -6.93 |
| F1 | 59.91741 | 26.33912 | 30-10 | 1 | 4.76 | 8.6 | -58.0 | -7.36 |
| 20 | 4.77 | 8.59 | -58.3 | -7.56 |
| 30 | 6.13 | 7.14 | -55.1 | -7.18 |
| 40 | 7.12 | 5.69 | -52.1 | -6.69 |
| 60 | 9.16 | 5.43 | -48.0 | -6.31 |
| 75 | 9.71 | 5.53 | -46.2 | -5.99 |
| 14 | 59.83368 | 25.61472 | 30-10 | 1 | 5.11 | 8.42 | -56.8 | -7.42 |
| 69 | 9.68 | 5.48 | -46.4 | -6.15 |
| 17 | 59.71694 | 25.01715 | 30-10 | 1 | 5.15 | 8.73 | -57.7 | -7.39 |
| 20 | 5.15 | 8.72 | -57.2 | -7.51 |
| 40 | 6.42 | 7.37 | -53.3 | -6.94 |
| 60 | 9.33 | 5.45 | -47.4 | -6.15 |
| 70 | 10.01 | 5.55 | -46.0 | -5.96 |
| 80 | 10.29 | 5.62 | -45.1 | -5.93 |
| 100 | 10.58 | 5.7 | -45.0 | -5.76 |
| F3 | 59.83883 | 24.83795 | 27-10 | 1 | 4.97 | 9.38 | -56.5 | -7.35 |
| 75 | 10.66 | 5.74 | -44.8 | -5.82 |
| 19 | 59.60894 | 24.35097 | 24-10 | 2 | 5.37 | 8.65 | -56.0 | -7.23 |
| 20 | 5.72 | 9.29 | -55.0 | -7.01 |
| 40 | 7.72 | 6.06 | -50.9 | -6.67 |
| 60 | 10.53 | 5.66 | -45.2 | -5.83 |
| 70 | 10.73 | 5.75 | -49.5 | -6.36 |
| 80 | 10.79 | 5.78 | -44.6 | -5.80 |
| H1 | 59.4556 | 22.95575 | 25-10 | 1 | 6.16 | 9.69 | -54.0 | -7.00 |
| 20 | 6.21 | 9.63 | -53.8 | -6.96 |
| 40 | 7.21 | 6.69 | -52.0 | -6.92 |
| 60 | 10.21 | 5.54 | n/m | n/m |
| 70 | 10.56 | 5.69 | -44.7 | -5.78 |
| 80 | 10.93 | 5.85 | -44.9 | -5.59 |
| 25 | 59.34349 | 21.9683 | 25-10 | 1 | 6.49 | 8.73 | -53.5 | -6.90 |
| 20 | 6.84 | 8.03 | -52.3 | -6.76 |
| 40 | 7.49 | 5.07 | -51.2 | -6.66 |
| 60 | 8.72 | 4.97 | -48.6 | -6.36 |
| 70 | 9.2 | 5.17 | -47.3 | -6.24 |
| 94 | 10.68 | 5.74 | -44.6 | -5.80 |
| H2 | 59.03402 | 21.08478 | 25-10 | 1 | 6.42 | 9.35 | -55.4 | -7.03 |
| 20 | 6.43 | 9.32 | -53.1 | -6.91 |
| 40 | 6.57 | 8.81 | -53.3 | -6.94 |
| 60 | 7.8 | 5.6 | -50.4 | -6.64 |
| 80 | 10.35 | 5.61 | -45.4 | -5.88 |
| 100 | 10.86 | 5.83 | -43.5 | -5.71 |
| 125 | 11.26 | 6.02 | -43.6 | -5.67 |
| 150 | 11.56 | 6.16 | -44.2 | -5.61 |
| 174 | 11.62 | 6.19 | -43.0 | -5.59 |
| 85 | 58.45963 | 20.91832 | 25-10 | 1 | 6.73 | 8.51 | -53.0 | -6.86 |
| 77 | 11.06 | 5.92 | -43.8 | -5.67 |
| 32 | 58.01968 | 20.5305 | 25-10 | 1 | 6.78 | 8.94 | -53.1 | -6.88 |
| 96 | 11.54 | 6.11 | -43.0 | -5.58 |
| 114 | 57.83001 | 22.28226 | 26-10 | 1 | 6.01 | 8.57 | -52.7 | -6.87 |
| 24 | 7.11 | 7.05 | -51.3 | -6.68 |
| G1 | 57.67119 | 23.57838 | 26-10 | 1 | 5.78 | 9.68 | -53.4 | -6.97 |
| 48 | 5.79 | 9.37 | -53.5 | -7.00 |
| 107 | 57.90268 | 23.86094 | 26-10 | 1 | 5.75 | 9.88 | -53.4 | -6.96 |
| 25 | 5.75 | 9.91 | -54.3 | -7.02 |
| V15 | 58.81672 | 23.21552 | 26-10 | 1 | 5.79 | 6.04 | -52.5 | -6.84 |
| 4 | 5.79 | 6.04 | -52.4 | -6.84 |

Table S4. Isotope, salinity and temperature data of seawater samples taken by the cruise No 34 of R/V Akademik Nikolay Strakhov (P. P. Shirshov Institute of Oceanology RAS, Russia) in June of 2017 (Fig. 2 (C)).

| **Station**  **No** | **Geographical position of sampling station** | | **Date** | **Depth**  **(m)** | **Salinity (PSU)** | **T (oC)** | **3H**  **(TU; ±1 sigma)** | **δ2H**  **(‰ VSMOW)** | **δ18O**  **(‰ VSMOW)** |
| --- | --- | --- | --- | --- | --- | --- | --- | --- | --- |
| **Lat. (oN)** | **Long. (oE)** |
| 5 | 58.42833 | 10.67000 | 18-06 | 4.4 | 31.42 | 14.06 | 4.4±0.3 | -6.1 | -0.82 |
| 196 | 34.65 | 9.75 | 1.0±0.1 | 2.8 | 0.33 |
| 16 | 58.17067 | 10.75333 | 20-06 | 5.0 | 30.22 | 15.04 | 5.0±0.4 | -7.8 | -1.05 |
| 215 | 35.13 | 7.57 | 1.1±0.1 | 1.9 | 0.21 |
| 32 | 57.83000 | 11.09167 | 22-06 | 5.6 | 31.22 | 14.79 | 5.6±0.4 | -4.6 | -0.55 |
| 47 | 33.79 | 12.09 | 12.3±0.8 | -1.2 | -0.16 |
| 33 | 54.99833 | 14.08333 | 23-06 | 7.0 | 7.55 | 14.80 | 7.0±0.5 | -49.9 | -6.46 |
| 47 | 13.10 | 9.32 | 7.6±0.5 | -39.2 | -5.06 |
| 75 | 55.24833 | 15.98167 | 24-06 | 7.5 | 7.40 | 14.14 | 7.5±0.5 | -49.3 | -6.49 |
| 92 | 18.01 | 6.95 | 8.7±0.6 | -29.9 | -4.00 |
| 84 | 55.30833 | 15.63667 | 25-06 | 7.0 | 7.47 | 14.50 | 7.0±0.5 | -50.0 | -6.53 |
| 97 | 18.27 | 6.91 | 7.2±0.5 | -31.0 | -3.96 |
| 90 | 55.30767 | 15.32167 | 26-06 | 7.3 | 7.46 | 14.14 | 7.3±0.5 | -50.1 | -6.48 |
| 88 | 17.84 | 6.97 | 8.0±0.6 | -29.9 | -3.79 |
| 106 | 55.21350 | 16.56150 | 28-06 | 6.3 | 7.41 | 13.86 | 6.3±0.4 | -49.1 | -6.39 |
| 91 | 14.52 | 6.12 | 7.7±0.5 | -36.2 | -4.67 |
| 107 | 55.21333 | 16.56067 | 28-06 | 6.4 | 7.45 | 13.91 | 6.4±0.5 | -49.7 | -6.41 |
| 58 | 9.77 | 4.83 | 5.9±0.4 | -48.4 | -6.26 |
| 146 | 55.39900 | 18.39833 | 29-06 | 7.2 | 7.36 | 13.89 | 7.2±0.5 | -50.6 | -6.51 |
| 85 | 12.08 | 5.43 | 7.3±0.5 | -42.3 | -5.46 |
| 169 | 54.84600 | 19.29500 | 30-06 | 6.6 | 7.43 | 14.06 | 6.6±0.5 | -49.4 | -6.41 |
| 108 | 13.61 | 6.55 | 7.8±0.6 | -38.1 | -4.97 |
| 172 | 55.78983 | 18.55167 | 30-06 | 7.0 | 7.31 | 14.06 | 7.0±0.5 | -50.2 | -6.57 |
| 107 | 12.05 | 6.55 | 7.9±0.5 | -41.0 | -4.97 |

Table S5. Isotope, salinity and temperature data of seawater samples taken by the cruise of Sailing Vessel BRABANDER (Klaipėda University, Lithuania) in August of 2017 (Fig. 2 (D)).

| **Station**  **No** | **Geographical position of sampling station** | | **Date** | **Depth**  **(m)** | **Salinity (PSU)** | **T (oC)** | **3H**  **(TU; ±1 sigma)** | **δ2H**  **(‰ VSMOW)** | **δ18O**  **(‰ VSMOW)** |
| --- | --- | --- | --- | --- | --- | --- | --- | --- | --- |
| **Lat. (oN)** | **Long. (oE)** |
| S1 | 59.00112 | 20.67586 | 21-08 | 0 | 6.33 | 18.6 | 6.2±0.4 | -53.8 | -6.90 |
| 80 | 10.40 | n/m | 6.4±0.5 | -44.8 | -5.86 |
| S2 | 58.12956 | 20.21146 | 22-08 | 0 | 6.34 | 17.7 | 6.3±0.5 | -54.5 | -7.16 |
| 80 | 11.21 | n/m | 6.9±0.5 | -44.3 | -5.78 |
| S3 | 57.25439 | 19.80935 | 22-08 | 0 | 6.40 | 18.3 | 6.2±0.4 | -54.2 | -7.12 |
| 80 | 9.97 | n/m | 6.4±0.5 | -44.5 | -5.91 |
| S4 | 56.56600 | 18.75911 | 22-08 | 0 | 6.85 | 17.1 | 6.0±0.4 | -52.0 | -6.73 |
| 60 | 7.68 | n/m | 6.8±0.5 | -49.4 | -6.46 |
| S5 | 55.87027 | 17.69714 | 23-08 | 0 | 7.10 | 17.5 | 6.7±0.5 | -51.3 | -6.72 |
| 60 | 7.44 | n/m | 5.8±0.4 | -49.8 | -6.51 |
| S6 | 55.41875 | 16.29296 | 23-08 | 0 | 7.50 | 12.8 | 6.3±0.4 | -50.0 | -6.53 |
| 70 | 14.24 | n/m | 7.0±0.5 | -37.1 | -4.88 |

Table S6. Isotope data of surface water samples taken in June and August of 2017 (data included into Figure 6).

| **Location** | **Geographical position of sampling point** | | **Date** | **3H**  **(TU; ±1 sigma)** | **δ2H**  **(‰ VSMOW)** | **δ18O**  **(‰ VSMOW)** |
| --- | --- | --- | --- | --- | --- | --- |
| **Lat. (oN)** | **Long. (oE)** |
| Nemunas River (close to Rusne) | 55.29826 | 21.38325 | 27-07 | 2.2±1.7* | -65.7 | -8.73 |
| Curonian Lagoon (close to Vente) | 55.35429 | 21.20172 | 27-07 | 3.8±1.8* | -63.2 | -8.49 |
| Neris River (close to border with Belarus) | 54.83877 | 25.74183 | 18-08 | 7.5±0.5 | -69.7 | -9.43 |

**direct 3H measurement
